# Supplementary material for: A dorsal-ventral gradient of Wnt3a/β-catenin signals controls mouse hindgut extension and colon formation
Source: Oxford University Press journal article supplement (doi:10.1242/dev.185108), 2020-03-10
Supplement: dev185108supp.pdf [file dev185108supp.pdf]

## Supplemental Data

A

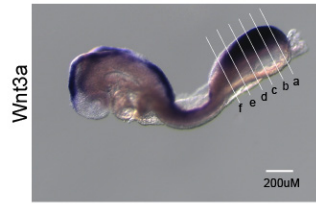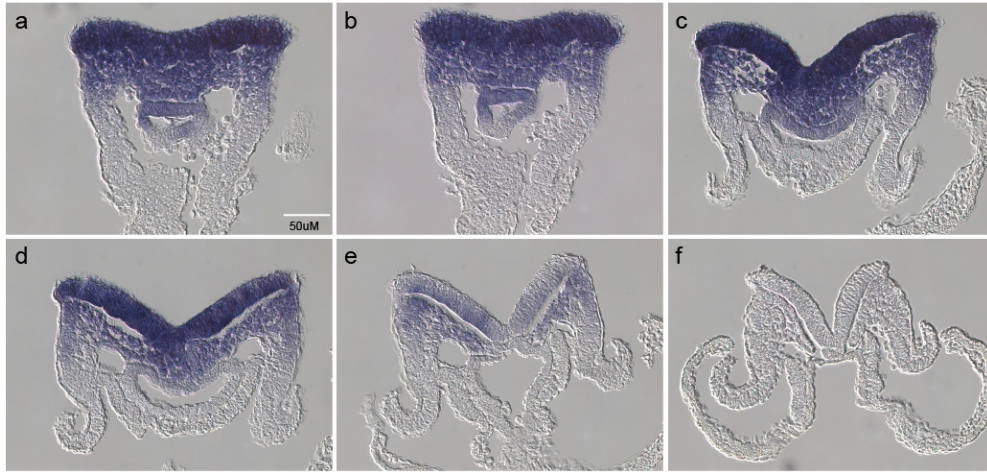

B

Gene expression along E8.75 guttube pseudo-space

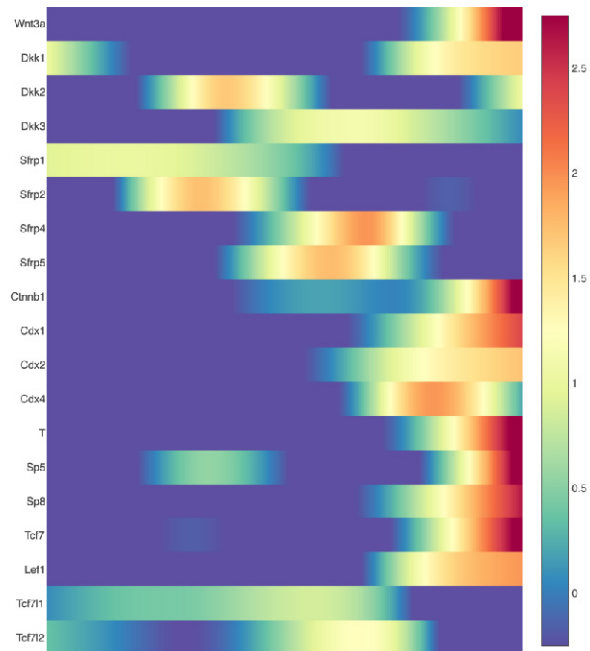

**Fig.S1. The expression of Wnt3a/ $\beta$ -catenin signaling pathway components in the extending gut.**

- A. WISH of *Wnt3a* expression in e8.5 (8-10 somite) wildtype embryo.  
(a-f) Transverse serial sections through the *Wnt3a* expression domain in the posterior region of the embryo, from posterior to anterior, illustrate the graded expression along the DV axis.
- B. Heat map of expression of select components of the Wnt3a/ $\beta$ -catenin signaling pathway along the anterior-posterior pseudo-space. Columns represent single cells ordered by pseudo-space, rows represent a single gene. Heat map generated from the endoderm explore website (Nowotschin et al., 2019).

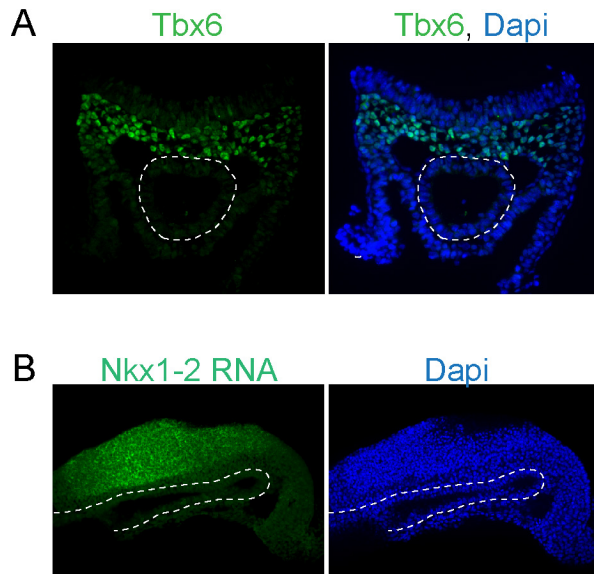

**Fig. S2. The PSM and NMP markers *Tbx6* and *Nkx1.2* are not expressed in the E8.5 hindgut epithelium.**

- A. Immunofluorescent detection of *Tbx6* protein expression in a cross-section through the caudal end of an E8.5 embryo. The hindgut is outlined with dashed lines.
- B. Sagittal optical section of fluorescent HCR in situ of *Nkx1.2* RNA expression in E8.5 embryo.

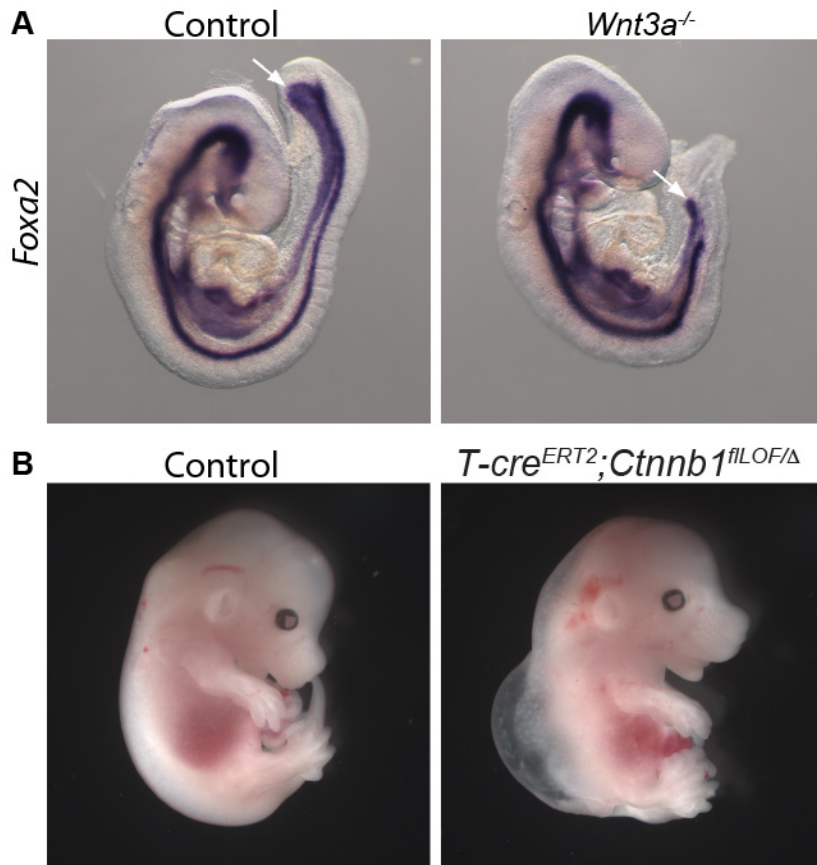

**Fig.S3. *Wnt3a*<sup>-/-</sup> and *T-Cre*<sup>ERT2</sup>;*Ctnnb1*<sup>flLOF/Δ</sup> mutants.**

- A. WISH of *Foxa2* expression in e9.5 control littermate and *Wnt3a*<sup>-/-</sup> mutants illustrating defective hindgut and notochord elongation. Arrows indicate caudal terminus of the hindgut.
- B. E14.5 control and *T-Cre*<sup>ERT2</sup>;*Ctnnb1*<sup>flLOF/Δ</sup> fetuses. A single dose of TAM was administered at E7.5.

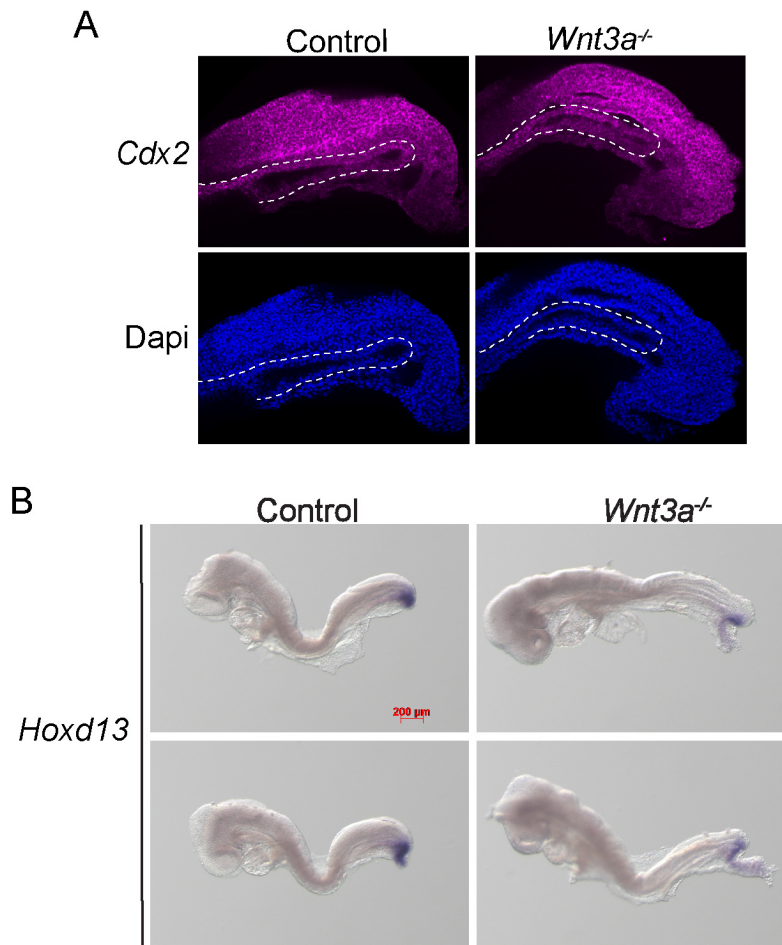

- A. **Fig. S4. *Cdx2* and *Hoxd13* remain caudally localized in *Wnt3a*<sup>-/-</sup> mutants.** Fluorescent in situ HCR of *Cdx2* expression in E8.5 control littermate and *Wnt3a*<sup>-/-</sup> mutants show persistent caudally localized *Cdx2* expression in the mutant hindgut and PS.
- B. Chromogenic WISH showing *Hoxd13* expression in E8.5 control littermate and *Wnt3a*<sup>-/-</sup> mutants.

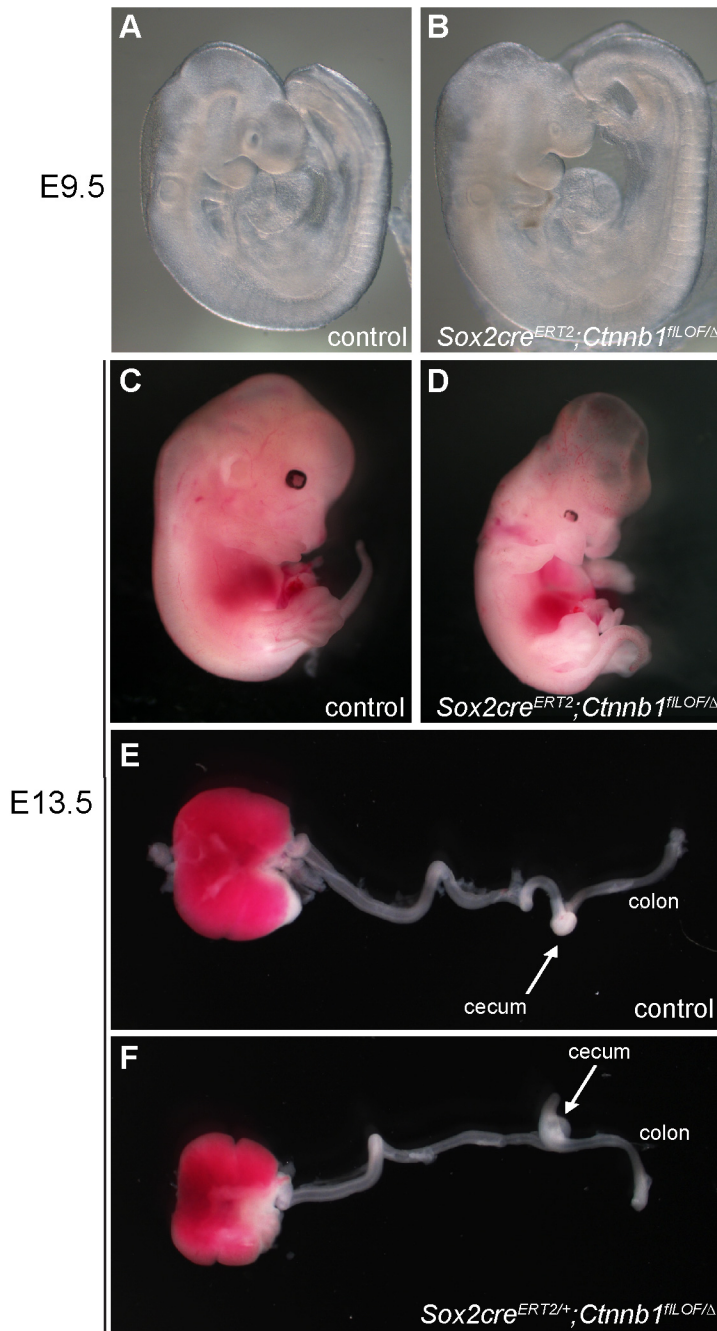

**Fig. S5. Targeting  $\beta$ -catenin in dorsal hindgut progenitors using Sox2-CreER.**

(A,B) E9.5 control *Sox2-CreER/+; Ctnnb1<sup>flLOF/+</sup>* embryo (A) and *Sox2-CreER/+; Ctnnb1<sup>flLOF/Δ</sup>* ( $\beta$ -catenin loss-of-function) mutant (B).

(C,D) E13.5 control *Sox2-CreER/+;Ctnnb1<sup>fl<sup>LOF/+</sup></sup>* fetus (C) and *Sox2-CreER/+;Ctnnb1<sup>fl<sup>LOF/Δ</sup></sup>* mutant (D).

(E,F) Isolated GI tracts from control *Sox2-CreER/+;Ctnnb1<sup>fl<sup>LOF/+</sup></sup>* fetus (E) and *Sox2-CreER/+;Ctnnb1<sup>fl<sup>LOF/Δ</sup></sup>* mutant (F) showing no loss of the colon.



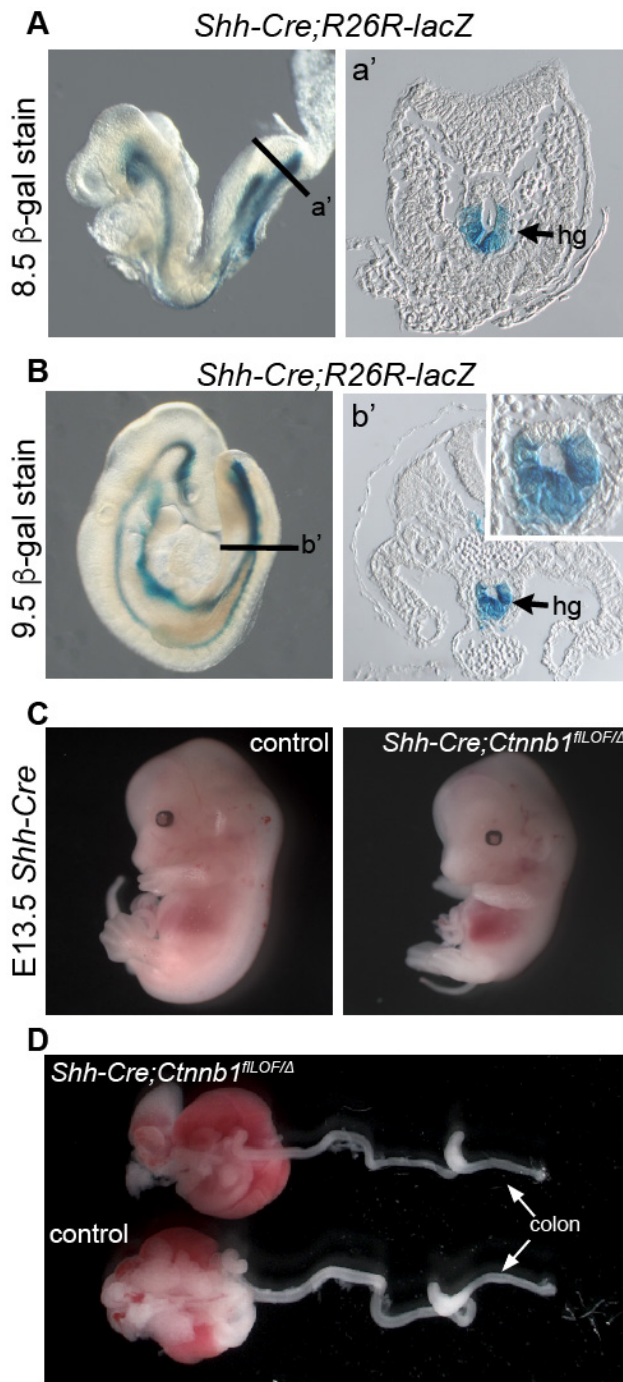

**Fig. S6. Targeting  $\beta$ -catenin in the ventral hindgut using *Shh-Cre*.**

(A) Whole-mount  $\beta$ -gal stain of E8.5 *Shh-Cre;R26R-lacZ* embryo and transverse section through distal hindgut (a').



(B) Whole-mount  $\beta$ -gal stain of E9.5 *Shh-Cre;R26R-lacZ* embryo and transverse sections through the hindgut region (b'). Inset: high power magnification of hindgut.

(C) Whole E13.5 control (left) and *Shh-Cre;Ctnnb1<sup>flLOF/ $\Delta$</sup>*  ( $\beta$ -catenin loss-of-function) mutant.

(D) Isolated GI tracts from control (bottom) and *Shh-Cre;Ctnnb1<sup>flLOF/ $\Delta$</sup>*  (top) showing no loss of the colon.

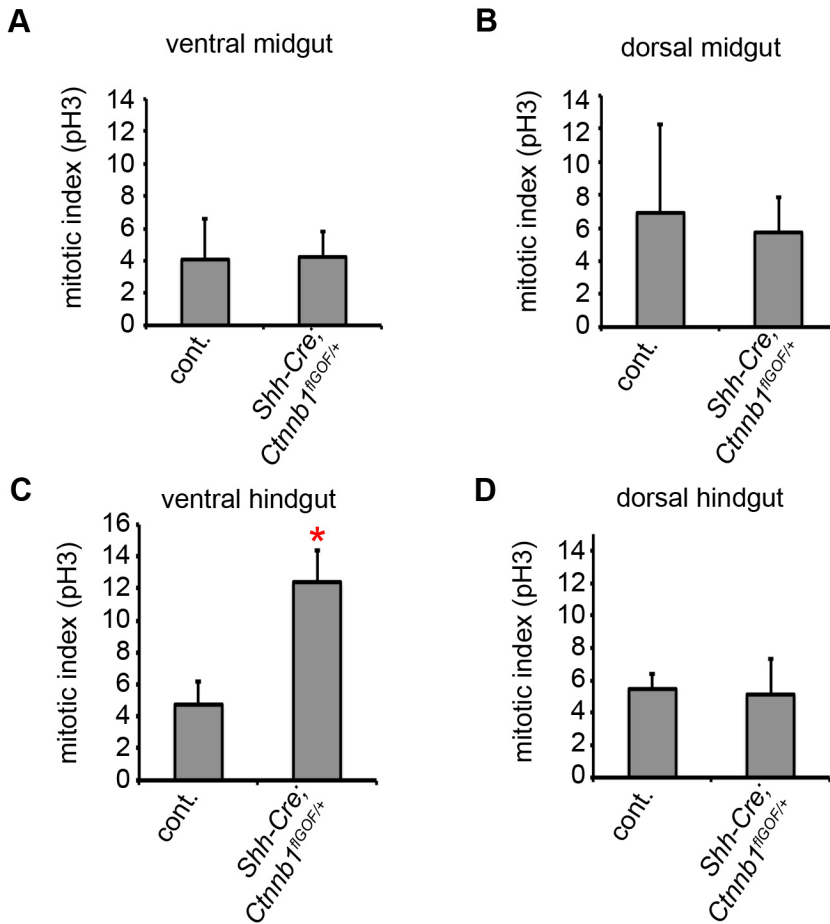

**Fig. S7. Cell proliferative effects of activating of  $\beta$ -catenin signaling in the ventral hindgut in *Shh-Cre;Ctnnb1<sup>flGOF/+</sup>* embryos.**

Graph of the mitotic index determined by pH3 detection in the following regions of E9.5 control and *Shh-Cre;Ctnnb1<sup>flGOF/+</sup>* embryos:

(A) ventral midgut

(B) dorsal midgut

(C) ventral hindgut, showing significantly higher mitotic index in the ventral hindgut of *Shh-Cre;Ctnnb1<sup>flGOF/+</sup>* embryos (Data are mean $\pm$ s.e.m.  $P < 2.05 \times 10^{-4}$ ).

(D) dorsal hindgut.
